# Supplementary material
Source: PubMed Central journal article supplement (PMC8340006)
Supplement: jamacardiol-e212704-s002.pdf [file jamacardiol-e212704-s002.pdf]

Navas-Acien A, Domingo-Relloso A, Subedi P, et al.  
Blood DNA methylation and incident coronary heart disease:  
evidence from the strong heart study  
*JAMA Cardiol* . Published online August 4, 2021.

doi:10.1001/jamacardio.2021.2704

**Differentially Methylated Positions (DMPs) selected by an untargeted elastic-net model  
in the Strong Heart Study using all 450K CpGs available (see details in eMethods)**

CpG

cg16491185  
cg00912164  
cg10783469  
cg03610228  
cg16335098  
cg14825413  
cg19823603  
cg21725652  
cg11827743  
cg11606444  
cg00319761  
cg23606718  
cg09420816  
cg08178991  
cg00441027  
cg06488395  
cg17612569  
cg07121722  
cg19397489  
cg01620164  
cg03305624  
cg19987665  
cg01447536  
cg05110241  
cg07594247  
cg27071405  
cg06045579  
cg06618418  
cg03401726  
cg24794228  
cg07628841  
cg12052203  
cg19802241  
cg18024631  
cg20102506

cg08972190  
cg26314055  
cg09949906  
cg08502511  
cg25745379  
cg00426425  
cg16594273  
cg17450425  
cg07739478  
cg06778273  
cg14180502  
cg02885519  
cg07772999  
cg21377521  
cg06779110  
cg25065723  
cg09294156  
cg11649016  
cg02758552  
cg18795569  
cg05977230  
cg26472690  
cg18832217  
cg07708818  
cg03072762  
cg12263872  
cg23256343  
cg02926127  
cg10139037  
cg13864107  
cg02591564  
cg06468454  
cg18921980  
cg24023859  
cg04250451  
cg07827796  
cg02694715  
cg19506794  
cg04678901  
cg20321801  
cg08186671  
cg16755833  
cg08546690

cg14559369  
cg21195231  
cg08521684  
cg08278357  
cg02740007  
cg07790279  
cg22266749  
cg22684370  
cg27124370  
cg17514665  
cg25191041  
cg17739936  
cg23950233  
cg01799653  
cg05714496  
cg14708411  
cg17712928  
cg22305455  
cg14436098  
cg20509869  
cg06513733  
cg24160582  
cg20696912  
cg21931419  
cg10503298  
cg04458548  
cg05553511  
cg13909342  
cg11969919  
cg18892461  
cg11924019  
cg23816537  
cg11120551  
cg21957156  
cg12691488  
cg02924370  
cg14249564  
cg03032497  
cg00203913  
cg17754980  
cg25551219  
cg16419638  
cg10588617

cg15515843  
cg26099633  
cg23055315  
cg08381620  
cg02531227  
cg09445967  
cg05618456  
cg19264651  
cg06668829  
cg14531668  
cg08325343  
cg17566325  
cg22110998  
cg15481791  
cg04084157  
cg15280757  
cg12688670  
cg14529406  
cg09926486  
cg18660898  
cg00462971  
cg06949053  
cg00168942  
cg04314463  
cg26430450  
cg26699755  
cg22293458  
cg00586551  
cg06225767  
cg26332052  
cg04037707  
cg15700537  
cg00159953  
cg08549335  
cg11503396  
cg17832704  
cg16175077  
cg10608230  
cg01794555  
cg06557358  
cg13702846  
cg23353543  
cg12753631

cg18237548  
cg23269663  
cg06731125  
cg21255128  
cg04549524  
cg11518839  
cg24172570  
cg27241845  
cg22162323  
cg00022308  
cg25016646  
cg09249494  
cg02004723  
cg01629749  
cg14645861  
cg07495811  
cg27572855  
cg20052760  
cg05982160  
cg09988528  
cg12374579  
cg16085042  
cg09073799  
cg10035564  
cg20487287  
cg26403843  
cg04080270  
cg08366845  
cg02079111  
cg18753162  
cg26126740  
cg00782607  
cg06277347  
cg22480459  
cg24488469  
cg12190305  
cg07263382  
cg19810457  
cg18899952  
cg05006892  
cg25705266  
cg26797124  
cg17626960

cg16517358  
cg02864535  
cg04280397  
cg06894334  
cg06385079  
cg23207412  
cg13071569  
cg06305609  
cg04837170  
cg12056772  
cg09080788  
cg11469308  
cg08344181  
cg10487970  
cg14657834  
cg07746882  
cg04742397  
cg21587650  
cg13030331  
cg03023465  
cg09444226  
cg16604233  
cg14262740  
cg15834037  
cg20701799  
cg14103336  
cg13180105  
cg02914087  
cg03966406  
cg18634506  
cg16808156  
cg18070562  
cg21530266  
cg02835462  
cg14717725  
cg27309253  
cg14769021  
cg19596755  
cg02811755  
cg03995457  
cg24578124  
cg10110953  
cg11643285

cg24720967  
cg13959448  
cg04490934  
cg02763617  
cg25033030  
cg17103217  
cg10890403  
cg05644480  
cg13348458  
cg13927669  
cg10263594  
cg21443773  
cg26048117  
cg03345232  
cg00574958  
cg15518113  
cg10546817  
cg00129811  
cg06009042  
cg03078169  
cg24424381  
cg27334938  
cg17323040  
cg25178900  
cg00972420  
cg09642020  
cg13911501  
cg18171855  
cg01520853  
cg14536784  
cg22186853  
cg16002641  
cg27588321  
cg22453911  
cg24979437  
cg12531328  
cg23195510  
cg07885629  
cg08032483  
cg00103568  
cg13101865  
cg22929859  
cg26542567

cg00713253  
cg26690744  
cg05080790  
cg05647197  
cg00134210  
cg08785922  
cg05349242  
cg07494610  
cg00989315  
cg00297876  
cg21666217  
cg22512573  
cg19794481  
cg09926178  
cg10895008  
cg04190578  
cg25810066  
cg20912205  
cg10179300  
cg07269557  
cg18618815  
cg25586410  
cg14666310  
cg02508743  
cg05203213  
cg06070970  
cg13972202  
cg27510041  
cg08291506  
cg10304824  
cg26924218  
cg19693031  
cg04626878  
cg21625568  
cg01159980  
cg10945539  
cg04439241  
cg11575901  
cg04396998  
cg16205375  
cg08748913  
cg00695391  
cg15022400



cg25739715  
cg14195318  
cg01127300  
cg15602423  
cg04590303  
cg03437912  
cg05771459  
cg23968558  
cg00756808  
cg03607117  
cg14291225  
cg05450916  
cg19577082  
cg05480350  
cg22317004  
cg17275148  
cg07568588  
cg02495604  
cg01311360  
cg18234115  
cg03159191  
cg25347728  
cg23371436  
cg14952266  
cg06191260  
cg10244461  
cg02324227  
cg00259518  
cg04511702  
cg21407354  
cg05114606  
cg06481800  
cg13279244  
cg24701662  
cg18826637  
cg22086322  
cg10654510  
cg25539628  
cg17445212  
cg22335340  
cg10833685  
cg08054038  
cg18815120

cg06484553  
cg26331343  
cg10720545  
cg14509921  
cg11491284  
cg15763172  
cg18635064  
cg05779585  
cg09423875  
cg10204259  
cg15043801  
cg22122321  
cg16249035  
cg04800394  
cg05053108  
cg17707095  
cg07609703  
cg01339111  
cg22018083  
cg05438378  
cg09006661  
cg17404981  
cg24694018  
cg19653417  
cg25635840  
cg03569404  
cg17959722  
cg02628823  
cg08210507  
cg00375691  
cg09580965  
cg09577083  
cg04232681  
cg12017805  
cg10154108  
cg05168229  
cg23646856  
cg04912273  
cg11404906  
cg09438698  
cg19266329  
cg01493517  
cg11024682

cg12479512  
cg12905114  
cg23256579  
cg02964087  
cg11202345  
cg11970252  
cg13836627  
cg01183122  
cg17469039  
cg14884932  
cg16810343  
cg13075942  
cg00696166  
cg26306154  
cg11165465  
cg02711608  
cg08693745  
cg02642565  
cg26955383  
cg06402325  
cg06500161  
cg09788666  
cg26987057  
cg06935361  
cg05577016  
cg04737759  
cg12485906  
cg01381586  
cg01297357  
cg19083407  
cg16888658  
cg03742808  
cg08189186  
cg23699918  
cg27184903  
cg05348973  
cg10172669  
cg04872689  
cg26351132  
cg08622677  
cg22094923  
cg02150231  
cg17979719

cg13279476  
cg19679544  
cg21121843  
cg14939821  
cg01661844  
cg17183905  
cg08480939  
cg05923914  
cg26329692  
cg14217069  
cg25653638  
cg15549075  
cg01157146  
cg21723861  
cg09082921  
cg17571335  
cg06436573  
cg15615575  
cg02094232  
cg23466418  
cg27215641  
cg05439368  
cg21293933  
cg05768824  
cg17095377  
cg25342699  
cg16423756  
cg13943133  
cg15931839  
cg12585028  
cg13593287  
cg04277893  
cg07388216  
cg07964553  
cg25418001  
cg13092901  
cg24554572  
cg25871427  
cg10503610  
cg17683593
